# Supplementary material
Source: publisher figshare collection journal article supplement (https://gsapubs.figshare.com/ndownloader/files/23295146)
Supplement: Supplementary file 1 [file 23295146]

## SUPPLEMENTARY FILES (GSA Data Repository)

**Figure DR 1:** Facies types of the Enkingen (SUBO 18) drill core. (A) Facies 1 clay-rich conglomeratic sandstone, 18.32-18.50 m depth. (B) Facies 2 argillaceous *Hydrobia*-limestone, thin section, 21.20 m depth. Gastropods (arrows) are cemented by sparry calcite. (C) Facies 3 laminated dolomite, thin section, 14.25 m depth. (D) Facies 3 laminated dolomite, thin section, 14.32 m depth. Note small peloids in lower part of the section (arrows). (E) Facies 4 bituminous shale, thin section, 17.60 m depth. (F) Facies 5 laminated claystone, 19.50 m depth. (G) Facies 6 stratified claystone, 5.47 m depth. (H) Facies 7 carbonaceous clay, 18.12 m depth. Note shell fragments of ostracodes (arrows).

**Figure DR 2:** Partial mass chromatogram of the F3 of the claystone sample from 8.46 m (analysed as BSTFA-derivatives). Mass spectra of the two archaeal compounds archaeol and C<sub>20</sub>/C<sub>25</sub>-archaeol are also shown. Compounds were identified from comparison with published mass spectra (Teixidor and Grimalt, 1992; Teixidor et al., 1993). TIC = total ion chromatogram.

**Table DR 1:** Description of the lithologic succession encountered by the Enkingen (SUBO 18) drill core.

**Table DR 2:** Compound-specific  $\delta^{13}\text{C}$  values (‰ V-PDB) of biomarkers detected in samples of the drilling Enkingen (SUBO 18).

## REFERENCES CITED

- Teixidor, P., and Grimalt, J.O., 1992, Gas chromatographic determination of isoprenoid alkylglycerol diethers in archaebacterial cultures and environmental samples: *Journal of Chromatography*, v. 607, p. 253–259.
- Teixidor, P., Grimalt, J.O., Pueyo, J.J., and Rodriguez-Valera, F., 1993, Isopranyl glycerol diethers in non-alkaline evaporitic environments: *Geochimica et Cosmochimica Acta*, v. 57, p. 4479–4489.

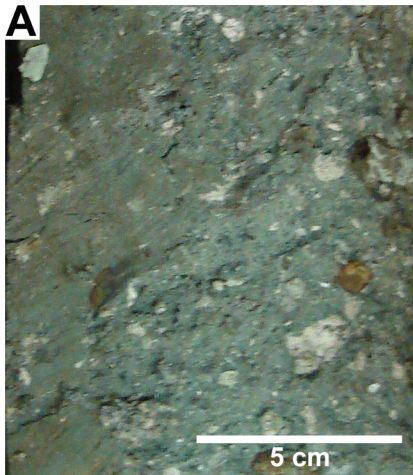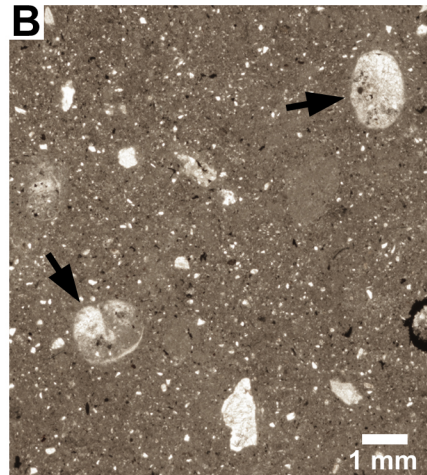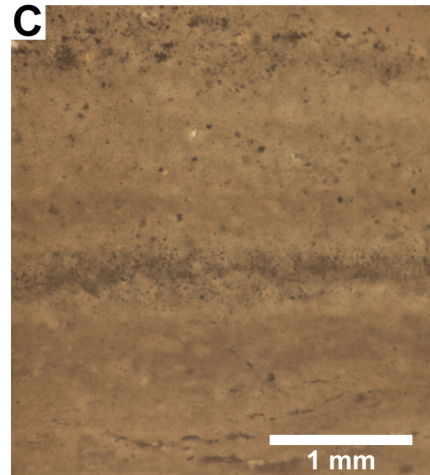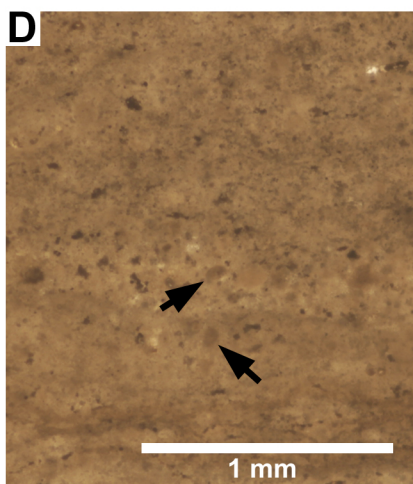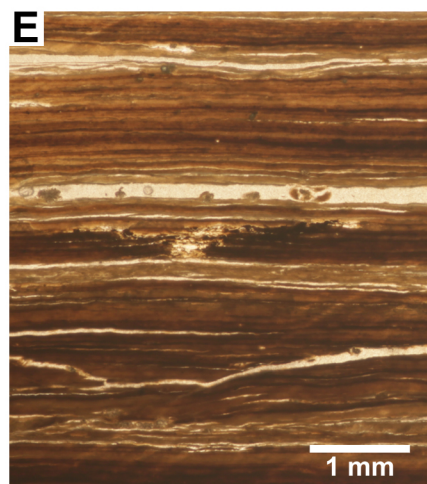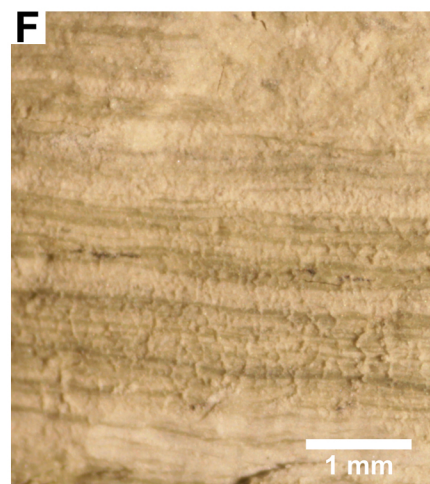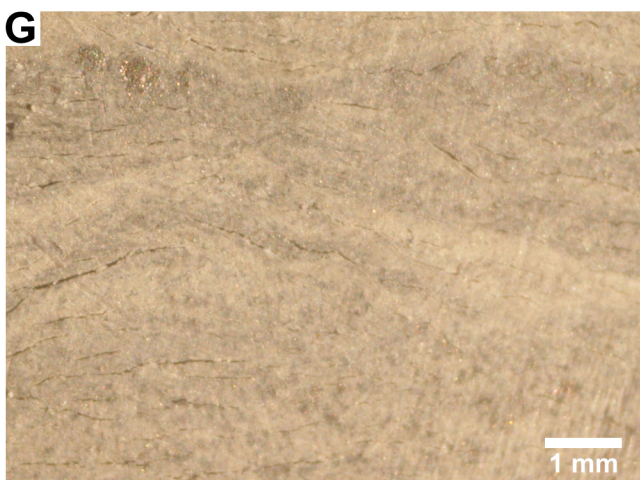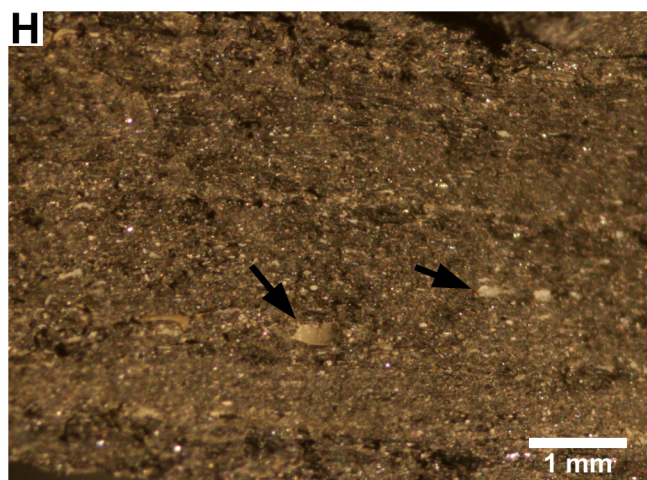

F3 (alcohol fraction + BSTFA)  
Claystone from 8.46 m  
(partial TIC)

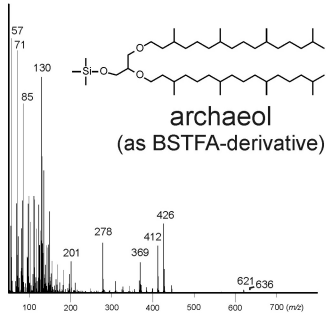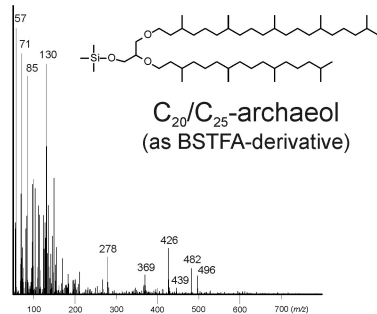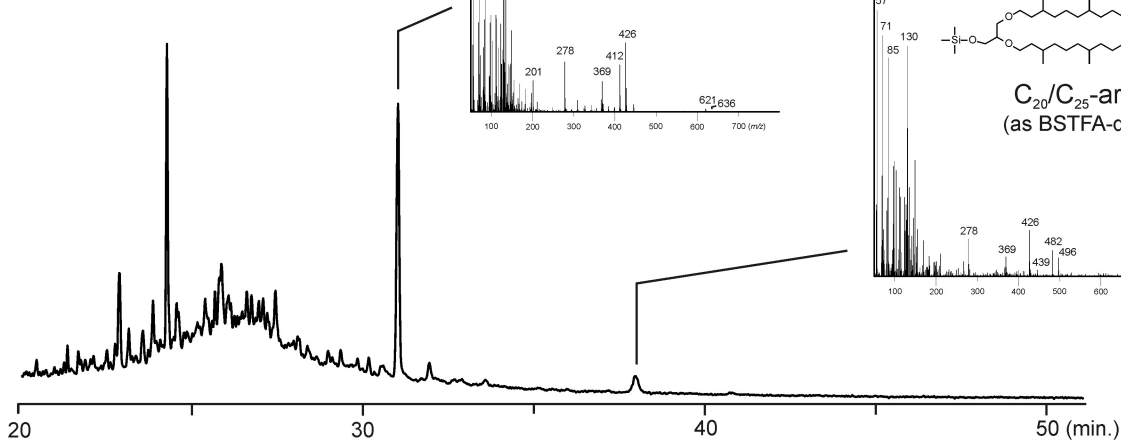

Table DR1

| Depth   | Lithology                                                                                                                                                                                                                                                                          |
|---------|------------------------------------------------------------------------------------------------------------------------------------------------------------------------------------------------------------------------------------------------------------------------------------|
| [m bsf] |                                                                                                                                                                                                                                                                                    |
| 0.70    | darkbrown clayey-sandy silt, humous and friable; scattered white-grey limestone pebbles up to 1.5 cm diameter;                                                                                                                                                                     |
| 1.60    | middle- to darkbrown, sandy-silty clay, weakly humous, stiff, calcareous, scattered Jurassic limestone pebbles up to 1.0 cm diameter in basal parts;                                                                                                                               |
| 2.35    | grey-brown sand and gravel (Jurassic limestones and cherts) in clayey-silty groundmass;                                                                                                                                                                                            |
| 2.60    | darkgrey-brown sand and gravel, in humous clayey-silty groundmass;                                                                                                                                                                                                                 |
| 3.55    | ochre-grey, strongly silty-sandy gravel (Jurassic limestone pebbles up to 4.0 cm diameter) in strongly calcareous groundmass;                                                                                                                                                      |
| 3.75    | darkgrey-brown, strongly silty-sandy gravel (Jurassic limestone pebbles up to 4.0 cm diameter) in humous groundmass;                                                                                                                                                               |
| 4.50    | ochre-grey, strongly silty-sandy gravel (Jurassic limestone pebbles and cobbles up to 9.0 cm diameter);                                                                                                                                                                            |
| 5.72    | olive-grey to white-grey claystone; stratification poorly visible (lithofacies 6);                                                                                                                                                                                                 |
| 6.15    | olive-grey to white-grey claystone with white-grey marl patches; poorly stratified (lithofacies 6);                                                                                                                                                                                |
| 8.10    | olive-grey claystone, stratification poorly visible (lithofacies 6), with disseminated iron sulfides and flat-oval iron sulfide concretions up to 1.5 cm in size; at -7.25 and -7.94 m depth a paper-thin micrite lamina each;                                                     |
| 9.00    | olive-grey laminated claystone (lithofacies 5) with iron sulfide concretions and layers; lamination due to dark organic-rich and light dolomitic layers; at -8.46 to -8.47 and -8.97 to -8.99 m depth black-brown carbonaceous clay (lithofacies 7);                               |
| 10.30   | olive-grey claystone, stratification poorly visible (lithofacies 6), with disseminated iron sulfides and flat-oval iron sulfide concretions up to 1.0 cm in size; few scattered flat FeS-rich lignite clasts with oxidation halo; slump fold at -9.80 m;                           |
| 10.65   | olive-grey laminated claystone (lithofacies 5) with iron sulfide concretions; lamination due to light dolomitic layers; few scattered flat FeS-rich lignite clasts with oxidation halo;                                                                                            |
| 12.00   | olive-grey bituminous shale with disseminated iron sulfide (lithofacies 4); lamination due to dark organic-rich and light dolomitic layers;                                                                                                                                        |
| 12.20   | alternation of (1) olive-grey bituminous shale with white-grey dolomite laminae, and (2) dark-grey bituminous shale without carbonate laminae (lithofacies 4); slump folds;                                                                                                        |
| 12.80   | dark-grey bituminous shale without carbonate laminae (lithofacies 4);                                                                                                                                                                                                              |
| 12.84   | alternation of (1) olive-grey bituminous shale with white-grey dolomite laminae, and (2) dark-grey bituminous shale without carbonate laminae (lithofacies 4); slump folds;                                                                                                        |
| 13.00   | dark-grey bituminous shale without carbonate laminae (lithofacies 4);                                                                                                                                                                                                              |
| 13.63   | olive-grey bituminous shale with few white-grey dolomite laminae (lithofacies 4)                                                                                                                                                                                                   |
| 14.83   | olive-grey laminated claystone with white-grey dolomite laminae (lithofacies 5); white-grey laminated dolomite layers (lithofacies 3) of 0.5 cm thickness at -14.25 m, -14.32 m, -14.39 m, -14.45 m and -14.68 m depth; sharp lower boundary;                                      |
| 15.00   | light-grey to white-grey, fine- to medium-grained laminated calcareous sandstone to arenaceous limestone (lithofacies 2);                                                                                                                                                          |
| 15.35   | olive-grey claystone, stratification poorly visible (lithofacies 6); white-grey arenaceous limestone layers (lithofacies 2) at -15.05 m, -15.18 m; -15.20 m, -15.21 m and -15.30 m depth;                                                                                          |
| 17.83   | olive-grey bituminous shale with white-grey dolomite laminae (lithofacies 4); at -17.08 m depth one cm-sized lignite clast;                                                                                                                                                        |
| 18.03   | light-grey to white-grey, fine- to medium-grained laminated arenaceous limestone to calcareous sandstone (lithofacies 2);                                                                                                                                                          |
| 18.20   | olive-grey marly polymict conglomeratic sandstone with suevit pebbles (lithofacies 1); at -18.12 m to -18.13 m depth intercalated layer of black-brown carbonaceous clay with quartz grains and ostracode shell debris (lithofacies 7);                                            |
| 18.26   | white-grey unstratified calcareous marlstone with coarse quartz grains and mm-sized shells (thin ostracod valves and one poorly preserved <i>Hydrobia</i> shell) (lithofacies 2); lower boundary diffuse;                                                                          |
| 18.32   | olive-grey stratified claystone (lithofacies 6);                                                                                                                                                                                                                                   |
| 18.50   | olive-grey, clayey-sandy marlstone with polymict pebbles composed of poorly rounded suevite- and peloidal limestone-clasts (lithofacies 1);                                                                                                                                        |
| 20.16   | olive-grey laminated claystone (lithofacies 5); at -19.24 m depth lignite clasts; at -18.55 m to -18.60 m, -19.59 m to -19.62 m, -19.91 m to -19.93 m and -20.13 m to 20.16 m depth white-grey calcareous marlstone layers (micrite);                                              |
| 21.06   | grey clayey polymict conglomeratic sandstone with cm-sized suevit pebbles (lithofacies 1); cm- to dm-scale stratification, from 20.42 to 20.55 m and 20.80 to 20.90 accumulation of coarse pebbles;                                                                                |
| 21.19   | grey, argillaceous dolomitic limestone with fine-grained quartz, peloids and <i>Hydrobia</i> shells (lithofacies 2); lower bedding plane with suevite pebbles;                                                                                                                     |
| 23.00   | grey clayey polymict conglomeratic sandstone with cm-sized altered crystalline rock fragments floating in fine-grained matrix (lithofacies 1); patches of iron sulfides with with oxidation halo; at 21.80 m depth white gastropod shell fragments; lower boundary poorly defined; |
| 25.00   | grey suevite poor in glass bombs and rich in crystalline rock fragments; high clay content due to <i>in situ</i> alteration;                                                                                                                                                       |
| 100.00  | suevite and impact melt agglomerates (Pohl et al. 2010; Reimold et al. 2010)                                                                                                                                                                                                       |
|         | [end-of-hole]                                                                                                                                                                                                                                                                      |

Table DR2

[illegible]
